# Supplementary material
Source: publisher figshare collection journal article supplement (https://tandf.figshare.com/ndownloader/files/22028586)
Supplement: Supplementary file 1 [file 22028586]

Physical rehabilitation in critically ill children

## **Online Supplement**

**Title:** Measurement and Reporting of Physical Rehabilitation Interventions in Pediatric Critical Care: A Scoping Review

### **Authors:**

David J Zorko MD, MSc candidate

Julie C Reid MSc PT, PhD

Janelle Unger MSc PT, PhD candidate

Devin McCaskell BSc

Maisa Saddik BHSc, MSc

Karen Choong MB, BCh, MSc

Michelle E Kho PT, PhD

**Supplemental Table S1.** Electronic search strategy

**a. OVID Medline**

|                                                    | <b>Subject Headings (MeSH)</b>                                                                                                                                                                                                                                                    | <b>Key Words</b>                                                                                                                                                                                                                                                                                                                                                                                |
|----------------------------------------------------|-----------------------------------------------------------------------------------------------------------------------------------------------------------------------------------------------------------------------------------------------------------------------------------|-------------------------------------------------------------------------------------------------------------------------------------------------------------------------------------------------------------------------------------------------------------------------------------------------------------------------------------------------------------------------------------------------|
| 1. ICU subject headings and keywords               | Critical care<br>Critical illness<br>Intensive care units<br>Respiration, artificial<br>Respiratory care units                                                                                                                                                                    | Acute care<br>Critical care<br>Critical care unit*<br>Critical* ill*<br>ICU<br>ICU patient*<br>Intensive care<br>Intensive care unit*<br>Intubated<br>Mechanical ventilation<br>Respiratory care unit*<br>Ventilated patient*                                                                                                                                                                   |
| 2. Physical activity subject headings and keywords | Activities of daily living<br>Exercise<br>Exercise therapy<br>Mobility limitation<br>Muscle strength<br>Physical and rehabilitation medicine<br>Physical therapy modalities<br>Range of motion, articular<br>Recovery of function<br>Rehabilitation<br>Rehabilitation, vocational | Activit*<br>Activit* of daily living<br>ADL<br>Early ambulation<br>Early mobili*<br>Exercis*<br>Exercise therap*<br>Functional mobili*<br>Mobili*<br>Muscle strength<br>Physical activit*<br>Physical and rehab*<br>medicine<br>Physical function*<br>Physical mobili*<br>Physical therap*<br>Physiotherap*<br>Range of motion<br>Recovery of function<br>Rehab*<br>Rehab* intervention*<br>ROM |

1. We combined all ICU subject headings and keywords with the OR operator

2. We combined all physical rehabilitations subject headings and keywords with the OR operator

3. We combined these 2 groups with the AND operator

**b. CINAHL**

|                                                          | <b>Subject Headings</b>                                                                                                                                            | <b>Keywords</b>                                                                                                                                                                                                                                                                                                                                                                                 |
|----------------------------------------------------------|--------------------------------------------------------------------------------------------------------------------------------------------------------------------|-------------------------------------------------------------------------------------------------------------------------------------------------------------------------------------------------------------------------------------------------------------------------------------------------------------------------------------------------------------------------------------------------|
| 1. ICU subject headings and key words                    | Critical care<br>Critical illness<br>Critically ill patients<br>Intensive Care Units<br>Respiration, artificial<br>Respiratory care Units                          | Acute care<br>Critical care<br>Critical care unit*<br>Critical* ill*<br>ICU<br>ICU patient*<br>Intensive care<br>Intensive care unit*<br>Intubated<br>Mechanical ventilation<br>Respiratory care unit*<br>Ventilated patient*                                                                                                                                                                   |
| 2. Physical rehabilitation subject headings and keywords | Activities of daily living<br>Early intervention<br>Exercise<br>Muscle strength<br>Physical activity<br>Physical therapy<br>Rehabilitation<br>Therapeutic exercise | Activit*<br>Activit* of daily living<br>ADL<br>Early ambulation<br>Early mobili*<br>Exercis*<br>Exercise therap*<br>Functional mobili*<br>Mobili*<br>Muscle strength<br>Physical activit*<br>Physical and rehab*<br>medicine<br>Physical function*<br>Physical mobili*<br>Physical therap*<br>Physiotherap*<br>Range of motion<br>Recovery of function<br>Rehab*<br>Rehab* intervention*<br>ROM |

1. We combined all ICU subject headings and keywords with the OR operator
2. We combined all physical rehabilitations subject headings and keywords with the OR operator
3. We combined these 2 groups with the AND operator

**c. AMED**

|                                                          | <b>Subject Headings</b>                                                                                                                                                                                          | <b>Keywords</b>                                                                                                                                                                                                                                                                                                                                                                                 |
|----------------------------------------------------------|------------------------------------------------------------------------------------------------------------------------------------------------------------------------------------------------------------------|-------------------------------------------------------------------------------------------------------------------------------------------------------------------------------------------------------------------------------------------------------------------------------------------------------------------------------------------------------------------------------------------------|
| 1. ICU subject headings and keywords                     | Critical care<br>Critical illness<br>Intensive care<br>Respiration artificial<br>Ventilators, mechanical                                                                                                         | Acute care<br>Critical care<br>Critical care unit*<br>Critical* ill*<br>ICU<br>ICU patient*<br>Intensive care<br>Intensive care unit*<br>Intubated<br>Mechanical ventilation<br>Respiratory care unit*<br>Ventilated patient*                                                                                                                                                                   |
| 2. Physical rehabilitation subject headings and keywords | Activities of daily living<br>Early ambulation<br>Exercise<br>Exercise therapy<br>Mobility limitation<br>Muscle strength<br>Physical therapy modalities<br>Physiotherapists<br>Range of motion<br>Rehabilitation | Activit*<br>Activit* of daily living<br>ADL<br>Early ambulation<br>Early mobili*<br>Exercis*<br>Exercise therap*<br>Functional mobili*<br>Mobili*<br>Muscle strength<br>Physical activit*<br>Physical and rehab*<br>medicine<br>Physical function*<br>Physical mobili*<br>Physical therap*<br>Physiotherap*<br>Range of motion<br>Recovery of function<br>Rehab*<br>Rehab* intervention*<br>ROM |

1. We combined all ICU subject headings and keywords with the OR operator
2. We combined all physical rehabilitations subject headings and keywords with the OR operator
3. We combined these 2 groups with the AND operator

**d. EMBASE**

|                                                          | <b>Subject Headings</b>                                                                                                                                                   | <b>Keywords</b>                                                                                                                                                                                                                                                                                                                                                                     |
|----------------------------------------------------------|---------------------------------------------------------------------------------------------------------------------------------------------------------------------------|-------------------------------------------------------------------------------------------------------------------------------------------------------------------------------------------------------------------------------------------------------------------------------------------------------------------------------------------------------------------------------------|
| 1. ICU subject headings and keywords                     | Artificial ventilation<br>Critical illness<br>Intensive care<br>Intensive care unit                                                                                       | Acute care<br>Critical care<br>Critical care unit*<br>Critical* ill*<br>ICU<br>ICU patient*<br>Intensive care<br>Intensive care unit*<br>Intubated<br>Mechanical ventilation<br>Respiratory care unit*<br>Ventilated patient*                                                                                                                                                       |
| 2. Physical rehabilitation subject headings and keywords | Daily life activity<br>Exercise<br>Kinesiotherapy<br>Mobilization<br>Muscle strength<br>Physical activity<br>Physiotherapy<br>Rehabilitation<br>Vocational rehabilitation | Activit* of daily living<br>ADL<br>Early ambulation<br>Early mobili*<br>Exercis*<br>Exercise therap*<br>Functional mobili*<br>Mobili*<br>Muscle strength<br>Physical activit*<br>Physical and rehab*<br>medicine<br>Physical function*<br>Physical mobili*<br>Physical therap*<br>Physiotherap*<br>Range of motion<br>Recovery of function<br>Rehab*<br>Rehab* intervention*<br>ROM |

1. We combined all ICU subject headings and keywords with the OR operator
2. We combined all physical rehabilitations subject headings and keywords with the OR operator
3. We combined these 2 groups with the AND operator

**e. PEDro**

| <b>Keyword</b>                                                                 |
|--------------------------------------------------------------------------------|
| 1. (intensive care unit OR critical care OR critical illness)                  |
| 2. (intensive care unit* AND “electrotherapies” [Therapy field])               |
| 3. (critical ill* AND “stretching, mobilisation, etc.” [Therapy field])        |
| 4. (intensive care unit* AND “stretching, mobilisation, etc.” [Therapy field]) |

**Supplemental Table S2a.** Intervention category definitions for physical activity interventions

| <b>Intervention Category</b> | <b>Definition/Criteria</b>                                                                                                                                                                                                                                                                                |
|------------------------------|-----------------------------------------------------------------------------------------------------------------------------------------------------------------------------------------------------------------------------------------------------------------------------------------------------------|
| Active interventions         | Includes activities such as active range of motion, active positioning, interactive video gaming, etc. that involve full participation from the patient (i.e. no passive components) but are not part of a progressive mobility regimen                                                                   |
| Cycling                      | Includes upper or lower extremity cycle ergometry, either passively completed by the equipment, components of active participation from the patient, or full participation from the patient                                                                                                               |
| Passive interventions        | Includes activities such as passive range of motion, positioning in bed, massage, etc. that are completely passive (i.e. no active components) but are not part of a progressive mobility regimen                                                                                                         |
| Progressive mobility         | Mobility activities progressing from less difficult (e.g. activity in bed) to more difficult (e.g., out of bed activities such as up to chair or ambulation). May include range of motion or strengthening activities, but only as part of a mobility activity and not as a separate therapeutic program. |
| Multicomponent               | Includes at least 2 or more interventions which could include any combination of single component interventions above                                                                                                                                                                                     |

**Supplemental Table S2b.** Intervention category definitions for chest physiotherapy interventions

| <b>Intervention Category</b> | <b>Definition/Criteria</b>                                                                                            |
|------------------------------|-----------------------------------------------------------------------------------------------------------------------|
| Lung inflations              | Includes manual or ventilator lung inflations                                                                         |
| Manual techniques            | Includes cupping, clapping, vibration, suctioning and saline instillation                                             |
| Positioning                  | Includes passive interventions like positioning that are not part of a progressive regimen                            |
| Multi-component              | Includes at least 2 or more interventions which could include any combination of single component interventions above |

**Supplemental Table S3:** Decision rules for applying “not applicable” when evaluating reporting items\*

| Item Number    | Item Description                                                                              | Not Applicable                                                         |
|----------------|-----------------------------------------------------------------------------------------------|------------------------------------------------------------------------|
| <b>CONSORT</b> |                                                                                               |                                                                        |
| 3b             | Changes to methods or trial design after trial commenced                                      | Studies that did not make changes to methods                           |
| 6b             | Any changes to trial outcomes after the trial commenced, with reasons                         | Studies that evaluated the planned outcomes as outlined in the methods |
| 7b             | Interim analyses                                                                              | Studies that did not conduct interim analyses                          |
| 8-10           | Randomization                                                                                 | Non-randomized trials                                                  |
| 12b            | Additional analyses                                                                           | Studies that did not plan to perform subgroup or adjusted analyses     |
| 14b            | Trial ended or stopped early                                                                  | Studies that did not end or were not stopped early                     |
| 17b            | Outcomes and estimation – presentation of absolute and relative risk size for binary outcomes | Studies that did not evaluate binary outcomes                          |
| 18             | Ancillary analyses                                                                            | Studies that did not perform subgroup or adjusted analyses             |
| <b>STROBE</b>  |                                                                                               |                                                                        |
| 6b             | Matching criteria                                                                             | Studies that did not match                                             |
| 12b            | Describe statistical methods used to examine subgroups                                        | Studies that did not plan to evaluate/analyze subgroups                |
| 12c, 14b       | Missing data                                                                                  | Studies that did not have missing data                                 |
| 12d            | Describe how loss to follow up was addressed                                                  | Studies that did not report any loss to follow up                      |
| 14c            | Summarize follow-up time                                                                      | Studies that did not plan to have a follow-up period                   |
| 16b            | Category boundaries                                                                           | Studies that did not plan to categorize continuous variables           |
| 16c            | Translating estimates of relative risk to absolute risk                                       | Studies that did not plan to evaluate relative or absolute risk        |
| 17             | Other analyses                                                                                | Studies that did not plan to perform additional analyses               |

| <b>SQUIRE</b> |                                                                   |                                                                          |
|---------------|-------------------------------------------------------------------|--------------------------------------------------------------------------|
|               | 13f Missing data                                                  | Studies that did not have missing data                                   |
| <b>CERT</b>   |                                                                   |                                                                          |
|               | 3 Describe whether exercises performed individually or in a group | We assumed that all interventions in the ICU were performed individually |
|               | 4 Describe whether exercises supervised or unsupervised           | We assumed that all interventions in the ICU were supervised             |
|               | 5 Describe how adherence to exercise is measured and reported     | Studies evaluating an intervention consisting of a single session        |
|               | 6 Describe motivation strategies                                  | Studies evaluating passive interventions (e.g., CPT)                     |
|               | 7a Describe decision rules for determining exercise progression   | Studies evaluating passive interventions (e.g., CPT)                     |
|               | 7b Describe how the exercise program was progressed               | Studies evaluating passive interventions (e.g., CPT)                     |
|               | 9 Describe any home program content                               | Studies that did not implement a home program                            |
|               | 10 Describe whether there are any non-exercise components         | Studies that did not implement a non-exercise component                  |
|               | 13 Describe exercise intensity                                    | Studies that only evaluated positioning                                  |
|               | 14b Describe how exercises are tailored to the individual         | Studies that did not individually tailor interventions                   |

Legend: CERT, Consensus on Exercise Reporting Template; CONSORT, Consolidated Standards of Reporting Trials; CPT, chest physiotherapy; ICU, intensive care unit; SQUIRE, Standards for Quality Improvement Reporting Excellence; STROBE, Strengthening the Reporting of Observational Studies in Epidemiology. \* Denominators for reporting calculations were determined by subtracting the total number of “not applicable” items from the total number of reporting tool items.



**Supplemental Table S4.** Stated functional outcomes

| <b>Stated Outcome</b>              | <b>ICF-CY Domain</b>                                                                                           | <b>ICF-CY Code</b> | <b>Value*</b> |
|------------------------------------|----------------------------------------------------------------------------------------------------------------|--------------------|---------------|
| <b>Body Structure and Function</b> |                                                                                                                |                    |               |
| Vital sign changes                 | <i>Functions of the respiratory system</i>                                                                     | <b>B440-B449</b>   | 14 (58.3)     |
| Blood gas changes                  |                                                                                                                |                    |               |
| Respiratory compliance/ spirometry |                                                                                                                |                    |               |
| Severity of illness score          |                                                                                                                |                    |               |
| Duration of intubation             | <i>Consciousness functions</i>                                                                                 | <b>B110</b>        | 2 (8.3)       |
| Delirium prevalence                |                                                                                                                |                    |               |
| Sedation use                       | <i>Functions of the cardiovascular, haematological, immunological and respiratory systems, other specified</i> | <b>B498</b>        | 2 (8.3)       |
| Oxidative stress markers           |                                                                                                                |                    |               |
| Neuropsychological measures        |                                                                                                                |                    |               |
| Chest x-ray changes                |                                                                                                                |                    |               |
|                                    | <i>Intellectual functions</i>                                                                                  | <b>B117</b>        | 1 (4.2)       |
|                                    | <i>Structure of the respiratory system</i>                                                                     | <b>S430</b>        | 1 (4.2)       |
| <b>Environmental Factors</b>       |                                                                                                                |                    |               |
| Number of PT/OT consultations      | <i>Health services, systems and policies</i>                                                                   | <b>E5800</b>       | 3 (12.5)      |
| <b>Personal Factors</b>            |                                                                                                                |                    |               |
| Quality of life                    | <i>Personal factors</i>                                                                                        | <b>No code</b>     | 1 (4.2)       |

Legend: ICF-CY, World Health Organization International Classification of Functioning, Disability, and Health (Child and Youth version); OT, occupational therapy; PT, physiotherapy.

\* Data presented as n (%), unless otherwise specified.
